# Supplementary material for: Diabetes Mellitus Increases the Risk of Active Tuberculosis: A Systematic Review of 13 Observational Studies
Source: PLOS journal article supplement (doi:10.1371/journal.pmed.0050152), 2008-07-10
Supplement: S1 (10.1371/journal.pmed.0050152.s001) [file journal.pmed.0050152.s001]

# Appendix : Calculation of attributable risk fraction of TB among diabetics and population attributable risk fraction of TB due to diabetes

Attributable risk fraction

where RR = relative risk (i.e. RR=3 for overall strength of association)

Population attributable risk fraction

where P(E) = prevalence of exposure (i.e. 6% in Mexico)
